# Supplementary material for: Sila-polyethers as innocent crystallization reagents for heavy alkali metal compounds
Source: Royal Society of Chemistry journal article supplement (doi:10.1039/c8ce01097h), 2018-01-01
Supplement: c8ce01097h1.pdf [file c8ce01097h1.pdf]

Electronic Supplementary Information on

# Sila-polyethers as *innocent* crystallization reagents for heavy alkali metal compounds

Fabian Dankert, Johanna Heine, Julia Rienmüller and Carsten von Hänisch\*

Department of Chemistry and Material Sciences Center, Philipps-Universität Marburg, Hans-Meerwein-Straße, 35043 Marburg, Germany.

## Experimental details

### Crystallographic details

#### RbOTf

|                                      |                                                                               |
|--------------------------------------|-------------------------------------------------------------------------------|
| Empirical formula                    | C <sub>4</sub> F <sub>12</sub> O <sub>12</sub> Rb <sub>4</sub> S <sub>4</sub> |
| Formula weight                       | 938.16                                                                        |
| Temperature/K                        | 100.0                                                                         |
| Crystal system                       | monoclinic                                                                    |
| Space group                          | <i>Cm</i>                                                                     |
| a/Å                                  | 19.2895(8)                                                                    |
| b/Å                                  | 23.4587(9)                                                                    |
| c/Å                                  | 5.0673(2)                                                                     |
| α/°                                  | 90                                                                            |
| β/°                                  | 100.992(2)                                                                    |
| γ/°                                  | 90                                                                            |
| Volume/Å <sup>3</sup>                | 2250.92(16)                                                                   |
| Z                                    | 4                                                                             |
| Q <sub>calc</sub> /g/cm <sup>3</sup> | 2.768                                                                         |
| μ/mm <sup>-1</sup>                   | 9.166                                                                         |
| F(000)                               | 1760.0                                                                        |

|                                                  |                                                                      |
|--------------------------------------------------|----------------------------------------------------------------------|
| Crystal size/mm <sup>3</sup>                     | 0.151 × 0.083 × 0.063                                                |
| Radiation                                        | MoK $\alpha$ ( $\lambda$ = 0.71073)                                  |
| 2 $\theta$ range for data collection/ $^{\circ}$ | 4.302 to 50.668                                                      |
| Index ranges                                     | -23 $\leq$ h $\leq$ 23, -28 $\leq$ k $\leq$ 25, -6 $\leq$ l $\leq$ 6 |
| Reflections collected                            | 33902                                                                |
| Independent reflections                          | 4201 [R <sub>int</sub> = 0.0680, R <sub>sigma</sub> = 0.0352]        |
| Data/restraints/parameters                       | 4201/458/317                                                         |
| Goodness-of-fit on F <sup>2</sup>                | 1.092                                                                |
| Final R indexes [I $\geq$ 2 $\sigma$ (I)]        | R <sub>1</sub> = 0.0558, wR <sub>2</sub> = 0.1081                    |
| Final R indexes [all data]                       | R <sub>1</sub> = 0.0644, wR <sub>2</sub> = 0.1122                    |
| Largest diff. peak/hole / e $\text{\AA}^{-3}$    | 1.18/-2.24                                                           |
| Flack parameter                                  | 0.51(3)                                                              |

**Details of crystal structure refinement:** The structure was refined as an inversion twin (BASF 0.50618). All CF<sub>3</sub> groups and most SO<sub>3</sub> groups showed significant disorder, either by rotation about the C-S bond of the triflate anion or tilting of the C-S bond. Disordered atoms were refined isotropically and a number of strict SADI, DFIX and ISOR restraints had to be used to stabilize the refinement. Occupancies of disordered groups were constrained to values yielding a chemically reasonable disorder model. One triflate anion is disordered about the mirror plane in such a way that the PART instruction cannot be used to generate a correct bonding pattern here, although the overall disorder model is reasonable here.

**$\alpha$ -CsOTf (100 K)**

|                                                              |                                                                              |
|--------------------------------------------------------------|------------------------------------------------------------------------------|
| Empirical formula                                            | CCsF <sub>3</sub> O <sub>3</sub> S                                           |
| Formula weight                                               | 281.98                                                                       |
| Temperature/K                                                | 100(2)                                                                       |
| Crystal system                                               | monoclinic                                                                   |
| Space group                                                  | <i>P</i> 2 <sub>1</sub> / <i>n</i>                                           |
| <i>a</i> /Å                                                  | 5.4549(6)                                                                    |
| <i>b</i> /Å                                                  | 6.0582(4)                                                                    |
| <i>c</i> /Å                                                  | 18.339(2)                                                                    |
| $\alpha$ /°                                                  | 90                                                                           |
| $\beta$ /°                                                   | 91.922(9)                                                                    |
| $\gamma$ /°                                                  | 90                                                                           |
| Volume/Å <sup>3</sup>                                        | 605.71(10)                                                                   |
| <i>Z</i>                                                     | 4                                                                            |
| $\rho_{\text{calc}}$ /g/cm <sup>3</sup>                      | 3.092                                                                        |
| $\mu$ /mm <sup>-1</sup>                                      | 6.456                                                                        |
| <i>F</i> (000)                                               | 512.0                                                                        |
| Crystal size/mm <sup>3</sup>                                 | 0.09 × 0.066 × 0.036                                                         |
| Radiation                                                    | MoK $\alpha$ ( $\lambda$ = 0.71073)                                          |
| 2 $\theta$ range for data collection/°                       | 4.444 to 57.996                                                              |
| Index ranges                                                 | -7 ≤ <i>h</i> ≤ 7, -8 ≤ <i>k</i> ≤ 8, -24 ≤ <i>l</i> ≤ 24                    |
| Reflections collected                                        | 22166                                                                        |
| Independent reflections                                      | 1609 [ <i>R</i> <sub>int</sub> = 0.0676, <i>R</i> <sub>sigma</sub> = 0.0224] |
| Data/restraints/parameters                                   | 1609/0/82                                                                    |
| Goodness-of-fit on <i>F</i> <sup>2</sup>                     | 1.088                                                                        |
| Final <i>R</i> indexes [ <i>I</i> ≥ 2 $\sigma$ ( <i>I</i> )] | <i>R</i> <sub>1</sub> = 0.0207, <i>wR</i> <sub>2</sub> = 0.0502              |
| Final <i>R</i> indexes [all data]                            | <i>R</i> <sub>1</sub> = 0.0239, <i>wR</i> <sub>2</sub> = 0.0511              |
| Largest diff. peak/hole / e Å <sup>-3</sup>                  | 1.28/-0.86                                                                   |

**$\alpha$ -CsOTf (293 K)**

|                                                              |                                                                              |
|--------------------------------------------------------------|------------------------------------------------------------------------------|
| Empirical formula                                            | CCsF <sub>3</sub> O <sub>3</sub> S                                           |
| Formula weight                                               | 281.98                                                                       |
| Temperature/K                                                | 293(2)                                                                       |
| Crystal system                                               | monoclinic                                                                   |
| Space group                                                  | <i>P</i> 2 <sub>1</sub> / <i>n</i>                                           |
| <i>a</i> /Å                                                  | 5.4705(11)                                                                   |
| <i>b</i> /Å                                                  | 6.1497(8)                                                                    |
| <i>c</i> /Å                                                  | 18.759(4)                                                                    |
| $\alpha$ /°                                                  | 90                                                                           |
| $\beta$ /°                                                   | 91.357(16)                                                                   |
| $\gamma$ /°                                                  | 90                                                                           |
| Volume/Å <sup>3</sup>                                        | 630.9(2)                                                                     |
| <i>Z</i>                                                     | 4                                                                            |
| $\rho_{\text{calc}}$ /g/cm <sup>3</sup>                      | 2.969                                                                        |
| $\mu$ /mm <sup>-1</sup>                                      | 6.198                                                                        |
| <i>F</i> (000)                                               | 512.0                                                                        |
| Crystal size/mm <sup>3</sup>                                 | 0.09 × 0.066 × 0.036                                                         |
| Radiation                                                    | MoK $\alpha$ ( $\lambda$ = 0.71073)                                          |
| 2 $\theta$ range for data collection/°                       | 4.344 to 57.992                                                              |
| Index ranges                                                 | -7 ≤ <i>h</i> ≤ 7, -8 ≤ <i>k</i> ≤ 8, -25 ≤ <i>l</i> ≤ 25                    |
| Reflections collected                                        | 14785                                                                        |
| Independent reflections                                      | 1680 [ <i>R</i> <sub>int</sub> = 0.0729, <i>R</i> <sub>sigma</sub> = 0.0310] |
| Data/restraints/parameters                                   | 1680/0/82                                                                    |
| Goodness-of-fit on <i>F</i> <sup>2</sup>                     | 0.979                                                                        |
| Final <i>R</i> indexes [ <i>I</i> ≥ 2 $\sigma$ ( <i>I</i> )] | <i>R</i> <sub>1</sub> = 0.0388, <i>wR</i> <sub>2</sub> = 0.0989              |
| Final <i>R</i> indexes [all data]                            | <i>R</i> <sub>1</sub> = 0.0579, <i>wR</i> <sub>2</sub> = 0.1048              |
| Largest diff. peak/hole / e Å <sup>-3</sup>                  | 1.53/-0.73                                                                   |

**Cs<sub>2</sub>C<sub>2</sub>O<sub>4</sub> (100 K)**

|                                                               |                                                                              |
|---------------------------------------------------------------|------------------------------------------------------------------------------|
| Empirical formula                                             | C <sub>2</sub> Cs <sub>2</sub> O <sub>4</sub>                                |
| Formula weight                                                | 353.84                                                                       |
| Temperature/K                                                 | 100.0                                                                        |
| Crystal system                                                | monoclinic                                                                   |
| Space group                                                   | <i>P</i> 2 <sub>1</sub> / <i>c</i>                                           |
| <i>a</i> /Å                                                   | 6.5506(4)                                                                    |
| <i>b</i> /Å                                                   | 10.8879(6)                                                                   |
| <i>c</i> /Å                                                   | 8.5685(6)                                                                    |
| $\alpha$ /°                                                   | 90                                                                           |
| $\beta$ /°                                                    | 97.405(2)                                                                    |
| $\gamma$ /°                                                   | 90                                                                           |
| Volume/Å <sup>3</sup>                                         | 606.03(7)                                                                    |
| <i>Z</i>                                                      | 4                                                                            |
| $\rho_{\text{calc}}/\text{cm}^3$                              | 3.878                                                                        |
| $\mu/\text{mm}^{-1}$                                          | 11.955                                                                       |
| <i>F</i> (000)                                                | 616.0                                                                        |
| Crystal size/mm <sup>3</sup>                                  | 0.117 × 0.081 × 0.066                                                        |
| Radiation                                                     | MoK $\alpha$ ( $\lambda$ = 0.71073)                                          |
| 2 $\Theta$ range for data collection/°                        | 6.082 to 50.54                                                               |
| Index ranges                                                  | -7 ≤ <i>h</i> ≤ 7, -13 ≤ <i>k</i> ≤ 13, -10 ≤ <i>l</i> ≤ 10                  |
| Reflections collected                                         | 6053                                                                         |
| Independent reflections                                       | 1095 [ <i>R</i> <sub>int</sub> = 0.0329, <i>R</i> <sub>sigma</sub> = 0.0217] |
| Data/restraints/parameters                                    | 1095/0/73                                                                    |
| Goodness-of-fit on <i>F</i> <sup>2</sup>                      | 1.099                                                                        |
| Final <i>R</i> indexes [ <i>I</i> >= 2 $\sigma$ ( <i>I</i> )] | <i>R</i> <sub>1</sub> = 0.0149, <i>wR</i> <sub>2</sub> = 0.0282              |
| Final <i>R</i> indexes [all data]                             | <i>R</i> <sub>1</sub> = 0.0199, <i>wR</i> <sub>2</sub> = 0.0293              |
| Largest diff. peak/hole / e Å <sup>-3</sup>                   | 0.55/-0.58                                                                   |

## Comparison of $\alpha$ -CsOTf (100 K), $\alpha$ -CsOTf (293 K) and $\alpha$ -CsOTf (Jansen)

**Table S1:** Comparison of unit cell parameters of single crystal measurements of  $\alpha$ -CsOTf at 100 K and 293 K with data from previous work by Jansen.<sup>[1]</sup>

|                       | $\alpha$ -CsOTf | $\alpha$ -CsOTf | $\alpha$ -CsOTf<br>(from powder data) <sup>[1]</sup> |
|-----------------------|-----------------|-----------------|------------------------------------------------------|
| Temperature/K         | 100             | 293             | 294                                                  |
| Crystal system        | monoclinic      | monoclinic      | monoclinic                                           |
| Space group           | $P2_1/n$        | $P2_1/n$        | $P2_1$                                               |
| a/Å                   | 5.4549(6)       | 5.4705(11)      | 9.7406(2)                                            |
| b/Å                   | 6.0582(4)       | 6.1497(8)       | 6.1640(1)                                            |
| c/Å                   | 18.339(2)       | 18.759(4)       | 5.4798(1)                                            |
| $\beta$ /°            | 91.922(9)       | 91.357(16)      | 104.998(1)                                           |
| Volume/Å <sup>3</sup> | 605.71(10)      | 630.9(2)        | 317.81(10)                                           |
| Z                     | 4               | 4               | 2                                                    |

**Table S2:** Comparison of interatomic distances obtained from single crystal measurements of  $\alpha$ -CsOTf at 100 K and 293 K with data from previous work by Jansen<sup>[1]</sup>.

| Interatomic<br>distances in Å | $\alpha$ -CsOTf<br>(100 K, this work) | $\alpha$ -CsOTf<br>(293 K, this work) | $\alpha$ -CsOTf<br>(from powder data) |
|-------------------------------|---------------------------------------|---------------------------------------|---------------------------------------|
| S-C                           | 1.819(3)                              | 1.776(8)                              | 1.805(7)                              |
| S-O                           | 1.436(2)-1.438(2)                     | 1.383(6) - 1.468(5)                   | 1.432(10) - 1.444(13)                 |
| C-F                           | 1.322(3)-1.328(3)                     | 1.253(11) - 1.377(9)                  | 1.311(11) - 1.320(15)                 |
| Cs-O                          | 3.010(1)-3.361(1)                     | 3.057(5) - 3.409(4)                   | 2.969(12) - 3.330(16)                 |
| Cs-F                          | 3.287(1)-3.653(2)                     | 3.381(6) - 3.657(7)                   | 3.492(12)- 3.847(11)                  |

## References

- [1] L. Hildebrandt, R. Dinnebier and M. Jansen, *Z. Anorg. Allg. Chem.*, 2005, **631**, 1660–1666.
